# Supplementary material for: Structural Achievability of an NH–π Interaction between Gln and Phe in a Crystal Structure of a Collagen-like Peptide
Source: Biomolecules. 2022 Oct 6;12(10):1433. doi: 10.3390/biom12101433 (PMC9599227; doi:10.3390/biom12101433)
Supplement: Supplementary file 1 [file biomolecules-12-01433-s001.zip › biomolecules-1915619-supplementary.pdf]

## Methods

### Calculation of geometric parameters

In order to calculate six geometric parameters,  $d_{NM}$ ,  $\theta$ ,  $\omega$ ,  $d_{C\gamma-\pi}$ ,  $\tau$ ,  $\chi$ , the coordinate sets including (1) the N and H atoms in one of the two amide NH groups of Gln or acetamide with shorter distance to the phenyl ring,  $(N_x, N_y, N_z)$  and  $(H_x, H_y, H_z)$ , (2) the  $C\gamma$  atom of Gln,  $(C_{\gamma,x}, C_{\gamma,y}, C_{\gamma,z})$ , (3) all atom of the phenyl ring of Phe,  $(C_{i,x}, C_{i,y}, C_{i,z})$ , where  $i = \gamma, \delta_1, \delta_2, \varepsilon_1, \varepsilon_2, \zeta$  were retrieved from the pdb files. (3) the  $C\gamma'$  ( $C'_{\gamma,x}, C'_{\gamma,y}, C'_{\gamma,z}$ ) and  $N'$  ( $N'_x, N'_y, N'_z$ ) were the point projected to the plan. Since hydrogen atoms are missing from most pdb files, theoretical positions of hydrogen atoms (X-H=1.0 Å) were then added with HGEN software, but only those at positions allowing this calculation unambiguously were used further. The mass center and normal vector of the phenyl ring,  $(M_x, M_y, M_z)$  and  $\vec{n}$ , and five vectors,  $\overrightarrow{MN}$ ,  $\overrightarrow{HM}$ ,  $\overrightarrow{HN}$ ,  $\overrightarrow{C\gamma N}$ ,  $\overrightarrow{MC\gamma}$  were defined as

$$(M_x, M_y, M_z) = \frac{1}{6} \sum (C_{i,x}, C_{i,y}, C_{i,z}) \quad (1)$$

$$i = \gamma, \delta_1, \delta_2, \varepsilon_1, \varepsilon_2, \zeta$$

$$\overrightarrow{C\gamma C\varepsilon_j} = (C_{\varepsilon_j,x}, C_{\varepsilon_j,y}, C_{\varepsilon_j,z}) - (C_{\gamma,x}, C_{\gamma,y}, C_{\gamma,z}) \quad (2)$$

$$j = 1, 2$$

, where  $\overrightarrow{C\gamma C\varepsilon_j}$  is the vector point from  $C\gamma$  atom to  $C\varepsilon_1$  (j=1) or  $C\varepsilon_2$  (j=2) of the Phe.

$$\vec{n} = \overrightarrow{C\gamma C\varepsilon_1} \times \overrightarrow{C\gamma C\varepsilon_2} \quad (3)$$

$\vec{n}$  is the normal vector of the phenyl ring of Phe.

$$\overrightarrow{MN} = (N_x, N_y, N_z) - (M_x, M_y, M_z) \quad (4)$$

$$\overrightarrow{HN} = (N_x, N_y, N_z) - (H_x, H_y, H_z) \quad (5)$$

$$\overrightarrow{HM} = (M_x, M_y, M_z) - (H_x, H_y, H_z) \quad (6)$$

$$\overrightarrow{C\gamma N} = (N_x, N_y, N_z) - (C_{\alpha,x}, C_{\alpha,y}, C_{\alpha,z}) \quad (7)$$

$$\overrightarrow{MC\gamma} = (C_{\gamma,x}, C_{\gamma,y}, C_{\gamma,z}) - (M_x, M_y, M_z) \quad (8)$$

$$\overrightarrow{C\gamma' N'} = (N'_x, N'_y, N'_z) - (C'_{\gamma,x}, C'_{\gamma,y}, C'_{\gamma,z}) \quad (9)$$

$$\overrightarrow{C\beta C\gamma} = (C_{\gamma,x}, C_{\gamma,y}, C_{\gamma,z}) - (C_{\beta,x}, C_{\beta,y}, C_{\beta,z}) \quad (10)$$

Three distance parameters,  $d_{NM}$ ,  $d_{HM}$ ,  $d_{C\alpha-\pi}$ , were defined as:

$$d_{NM} = |\overrightarrow{NM}| \quad (11)$$

$$d_{C\alpha-\pi} = \frac{|\overrightarrow{MC\alpha} \cdot \vec{n}|}{|\vec{n}|} \quad (12)$$

Three angle parameters,  $\theta$ ,  $\omega$ ,  $\tau$ ,  $\chi$  were defined as:

$$\theta = |\arccos\left(\frac{|\overrightarrow{NM} \cdot \vec{n}|}{|\overrightarrow{NM}| |\vec{n}|}\right)| \quad (0^\circ < \theta < 90^\circ) \quad (13)$$

$$\omega = \arccos\left(\frac{\overrightarrow{HN} \cdot \overrightarrow{HM}}{|\overrightarrow{HN}| |\overrightarrow{HM}|}\right) \quad (0^\circ < \omega < 180^\circ) \quad (14)$$

$$\tau = \arcsin\left(\frac{\overrightarrow{C\gamma N} \cdot \vec{n}}{|\overrightarrow{C\gamma N}| |\vec{n}|}\right) \quad (-90^\circ < \tau < 90^\circ) \quad (15)$$

$$\chi = \arccos\left(\frac{\overrightarrow{C\gamma'N'} \cdot \overrightarrow{C\beta C\gamma}}{|\overrightarrow{C\gamma'N'}| |\overrightarrow{C\beta C\gamma}|}\right) \quad (0^\circ < \chi < 180^\circ) \quad (16)$$

$\theta$  is the acute angle ( $0^\circ < \theta \leq 90^\circ$ ) between the vector  $\overrightarrow{NM}$  and the normal vector  $\vec{n}$ .  $\omega$  is the angle between the vector  $\overrightarrow{NH}$  and  $\overrightarrow{HM}$ .  $\tau$  is the angle between the  $\overrightarrow{C\gamma N}$  and the phenyl plane. If  $C\gamma$  is located in the same direction as the normal vector,  $\vec{n}$ , of the phenyl ring, it is positive ( $0^\circ < \tau < 90^\circ$ ), otherwise, it is negative ( $-90^\circ < \tau < 0^\circ$ ).  $\chi$  is the angle between the vector  $\overrightarrow{C\gamma'N'}$  and  $\overrightarrow{C\beta C\gamma}$ .

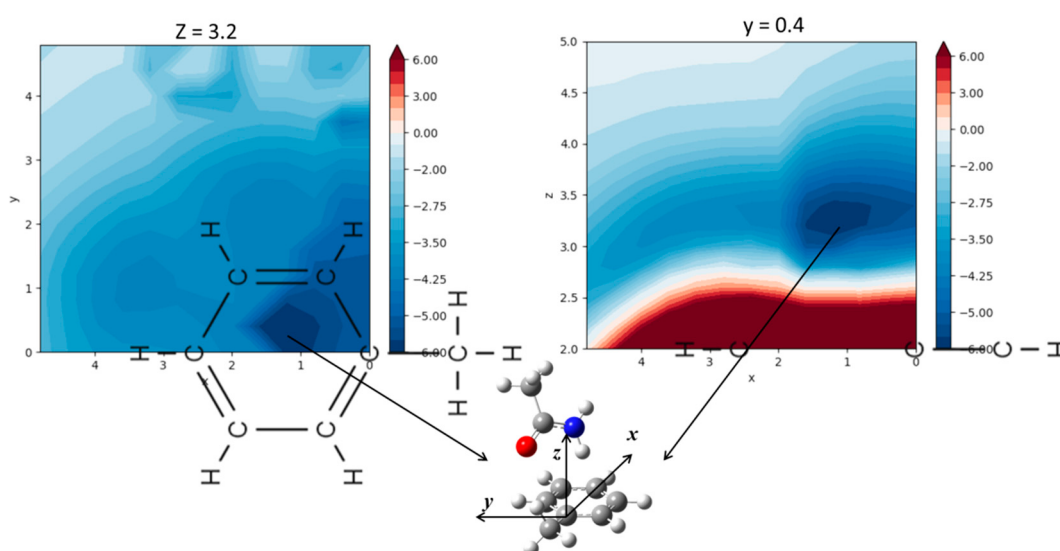

Figure S1. Energy surface of an acetamide-toluene complex with quantum chemical calculation. The intersection of the three-dimensional energy surface on a x,y-plane in the reference frame in left, and a z,x-plane in the reference frame in right.

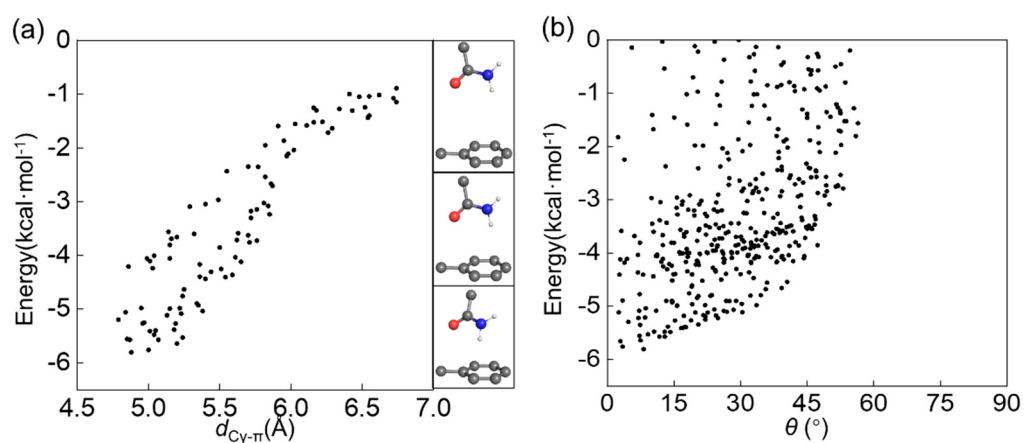

Figure S2. Scatter plot of the data points with (a)  $40^\circ < \tau < 50^\circ$  are projected on the  $\Delta E$ -  $d_{C\gamma-\pi}$  plane and (b)  $d_{NM} \leq 4$  Å are projected on the  $\Delta E$ - $\theta$  plane.

Table S1. Terms of interaction energy from S $\square$ PT2+3/aug-cc-pVQZ and MP2 methods.

|                    | S $\square$ PT (kcal/mol) | MP2 (kcal/mol) |
|--------------------|---------------------------|----------------|
| $E_{\text{ele}}$   | -4.64                     |                |
| $E_{\text{ee}}$    | 7.30                      |                |
| $E_{\text{ind}}$   | -1.67                     |                |
| $E_{\text{disp}}$  | -6.31                     |                |
| $E_{\text{total}}$ | -5.31                     | -5.72          |

Table S2. Crystal. Statistics of crystal data collection and structure refinement  
 One crystal was used for each structure. Values in parentheses are for the highest resolution shell.  $R_{merge} = \sum h \sum i |I_{h,i} - \bar{I}_h| / \sum h \sum i I_{h,i}$ , where  $\bar{I}_h$  is the mean intensity of the  $i$  observations of symmetry related reflections of  $h$ .  $R = \sum |F_{obs} - F_{calc}| / \sum F_{obs}$ , where  $F_{calc}$  is the calculated protein structure factor from the atomic model ( $R_{free}$  was calculated with 5% of the reflections selected randomly).

|                                                        | 7VEG                             |
|--------------------------------------------------------|----------------------------------|
| <b>A. Data collection</b>                              |                                  |
| Space Group                                            | P2 <sub>1</sub> 2 2 <sub>1</sub> |
| Cell dimensions                                        |                                  |
| a, b, c (Å)                                            | 24.09, 28.01, 73.37              |
| α, β, γ (°)                                            | 90, 90, 90                       |
| Resolution (Å)                                         | 50.00~1.385                      |
| R <sub>merge</sub> (%)                                 | 14.1 (41.9)                      |
| I / σI                                                 | 44.5 (4.86)                      |
| Completeness (%)                                       | 90.62 (23.70)                    |
| Redundancy                                             | 11.2 (4.3)                       |
| <b>B. Refinement</b>                                   |                                  |
| Resolution (Å)                                         | 22.89~1.385                      |
| No.reflections                                         | 9667 (246)                       |
| R <sub>work</sub> / R <sub>free</sub> (%) <sup>a</sup> | 16.7 / 18.0                      |
| No. atoms                                              | 598                              |
| Protein                                                | 435                              |
| Ligands                                                | 48                               |
| solvent                                                | 115                              |
| B-factors                                              |                                  |
| Protein                                                | 15.19                            |
| R.m.s.d. <sup>b</sup>                                  |                                  |
| Bond lengths (Å)                                       | 0.011                            |
| Bond angles (°)                                        | 1.43                             |
| Ramachandran plot statistics (%)                       |                                  |
| Most favored                                           | 100                              |
| □dditional allowed                                     | 0.0                              |
| Generously allowed                                     | 0.0                              |
| Disallowed                                             | 0.0                              |

<sup>a</sup> 10% of reflections were included in the test set.

<sup>b</sup> Root mean square deviation.

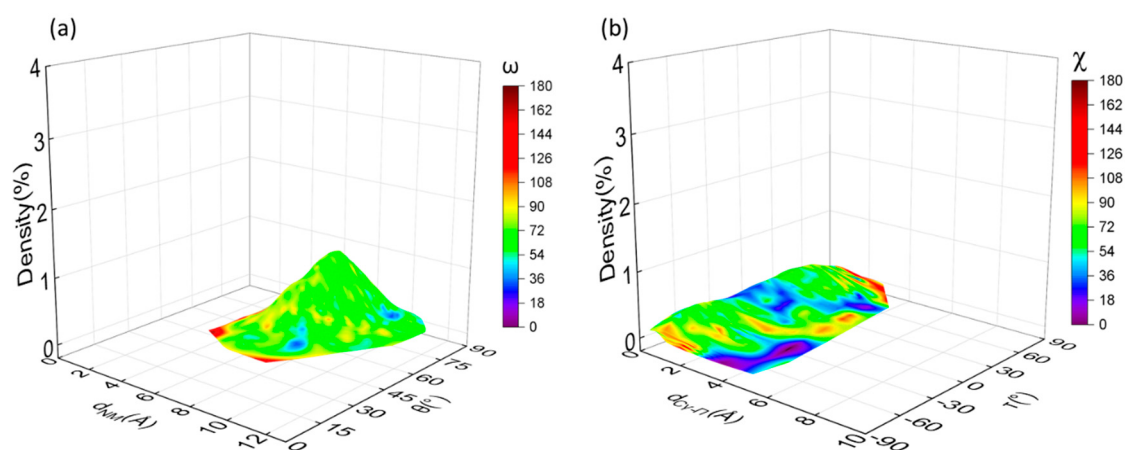

Figure S3. Molecular dynamics simulation of the collagen-like peptide GPQGFO. The geometric parameters of the Q-F pair between the trailing and leading chain were extracted from the trajectory and plotted into three-dimensional density maps. (a) Conformation occurring percentage is plotted against  $d_{NM}$  and  $\theta$ . The surface is color-coded with  $\omega$ . (b) Conformation occurring percentage is plotted against  $d_{C\gamma-\pi}$  and  $\tau$ . The surface is color-coded with  $\chi$ . The color scales are located on the right. Insets of (a, b) show the most occurring conformations.

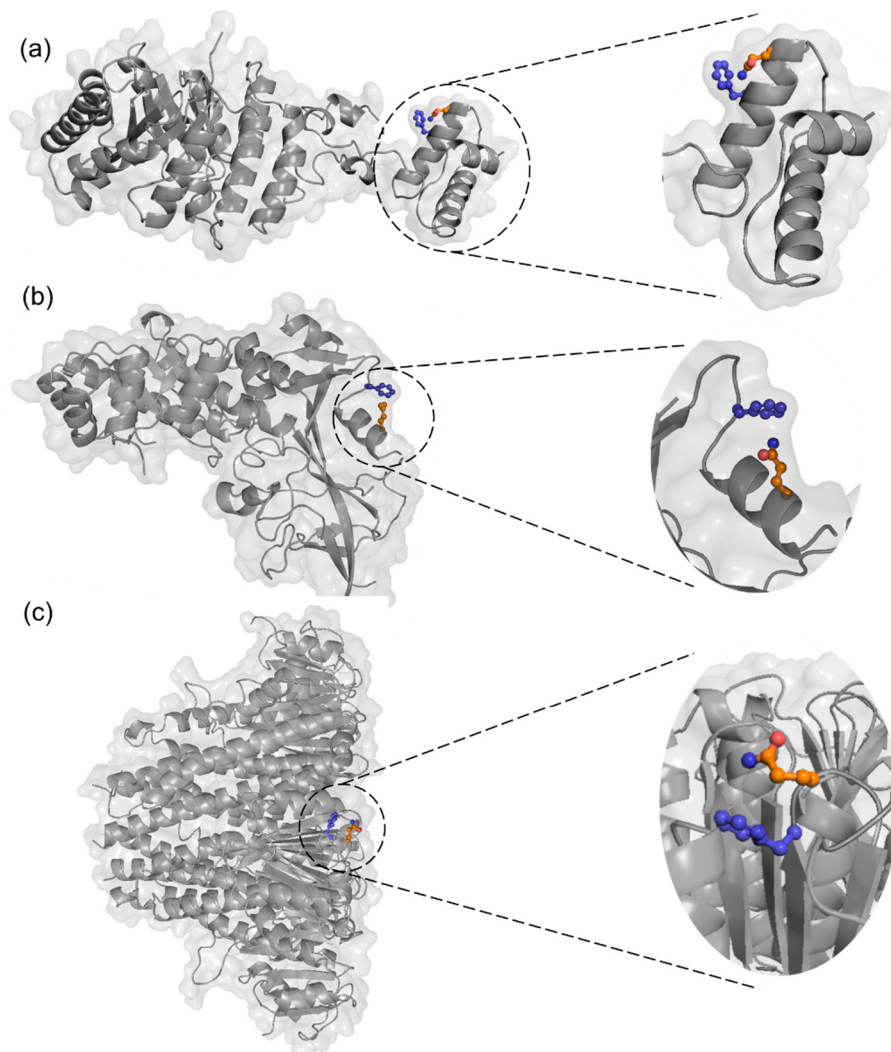

Figure S4. Side chain interactions of Q-F pairs exposed on protein surface in the crystal structure of PDB ID: (a) 4OV4, (b) 7ODC, and (c) 3CK6.

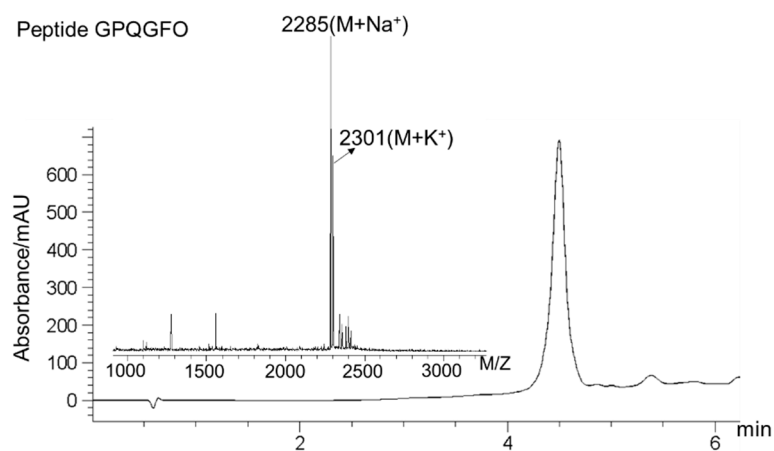

Figure S5. HPLC Chromatograms and Mass Spectrometry analysis of peptides. Peptide GPQGFO:  $[M+Na^+]$  expected = 2285.39 / observed = 2285.0

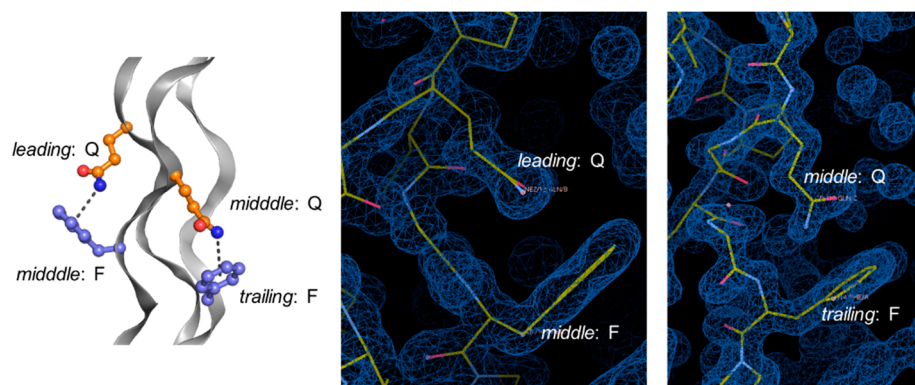

Figure S6. The electron density map of the Q-F pairwise. Figure were generated with COOT.
